# Supplementary material
Source: PubMed Central journal article supplement (PMC7610605)
Supplement: EMS78336-supplement-1.pdf [file EMS78336-supplement-1.pdf]

## Reporting Summary

Nature Research wishes to improve the reproducibility of the work that we publish. This form provides structure for consistency and transparency in reporting. For further information on Nature Research policies, see [Authors & Referees](#) and the [Editorial Policy Checklist](#).

### Statistical parameters

When statistical analyses are reported, confirm that the following items are present in the relevant location (e.g. figure legend, table legend, main text, or Methods section).

n/a | Confirmed

- The exact sample size ( $n$ ) for each experimental group/condition, given as a discrete number and unit of measurement
- An indication of whether measurements were taken from distinct samples or whether the same sample was measured repeatedly
- The statistical test(s) used AND whether they are one- or two-sided  
*Only common tests should be described solely by name; describe more complex techniques in the Methods section.*
- A description of all covariates tested
- A description of any assumptions or corrections, such as tests of normality and adjustment for multiple comparisons
- A full description of the statistics including central tendency (e.g. means) or other basic estimates (e.g. regression coefficient) AND variation (e.g. standard deviation) or associated estimates of uncertainty (e.g. confidence intervals)
- For null hypothesis testing, the test statistic (e.g.  $F$ ,  $t$ ,  $r$ ) with confidence intervals, effect sizes, degrees of freedom and  $P$  value noted  
*Give  $P$  values as exact values whenever suitable.*
- For Bayesian analysis, information on the choice of priors and Markov chain Monte Carlo settings
- For hierarchical and complex designs, identification of the appropriate level for tests and full reporting of outcomes
- Estimates of effect sizes (e.g. Cohen's  $d$ , Pearson's  $r$ ), indicating how they were calculated
- Clearly defined error bars  
*State explicitly what error bars represent (e.g. SD, SE, CI)*

*Our web collection on [statistics for biologists](#) may be useful.*

### Software and code

Policy information about [availability of computer code](#)

Data collection

No software used

## Data analysis

Completed genomes downloaded from the NCBI database were converted into pseudo-fastq files using Wgsim (<https://github.com/lh3/wgsim>). Multiple assemblies using VelvetOptimiser v2.2.5 and Velvet v1.2. The assemblies were improved by scaffolding the best N50 and contigs using SSPACE and sequence gaps filled using GapFiller.

Sequence reads were mapped to a relevant reference genome using SMALT. Consensus sequences were obtained using samtools. A maximum likelihood tree was constructed using RAxML. Time scaled trees were generated using BEAST 1.8.2. and Beagle.

Pseudogenes were predicted during the PROKKA. Proteins in a genome was searched against UniProtKB (Swiss-Prot) using BLASTp 54 or UniProtKB (TrEMBL). The UniProt ID Mapping tool was used to assign Gene ontology (GO) terms to all pseudogenes. GO was assigned to all non-pseudogenes (CDS features) using InterProScan. The R package topGO with Fisher's exact test was used to identify enriched GO terms.

Pan-genome association analysis were performed using Nucmer, Get\_homologues, the distmat function in EMBOSS and the graph was processed in BioLayout.

Identification of gene acquisitions or losses associated with host-switching events were performed using the R package APE.

Codon usage bias analysis was performed using the EMBOSS tools cusp and cai.

Genome-wide positive selection analysis were performed using get\_homologues, MUSCLE 3.8.31, pal2nal v14, PhiPack and PAML.

Functional categories were annotated using the COGs and GO databases as reference. Identification of overrepresented GO categories of positively selected genes in different hosts, we used BiNGO and REVIGO.

For manuscripts utilizing custom algorithms or software that are central to the research but not yet described in published literature, software must be made available to editors/reviewers upon request. We strongly encourage code deposition in a community repository (e.g. GitHub). See the Nature Research [guidelines for submitting code & software](#) for further information.

## Data

Policy information about [availability of data](#)

All manuscripts must include a [data availability statement](#). This statement should provide the following information, where applicable:

- Accession codes, unique identifiers, or web links for publicly available datasets
- A list of figures that have associated raw data
- A description of any restrictions on data availability

The sequence datasets generated during the current study are available in the European Nucleotide Archive (ENA) ([www.ebi.ac.uk/ena](http://www.ebi.ac.uk/ena)) with the accession number PRJEB20741.

## Field-specific reporting

Please select the best fit for your research. If you are not sure, read the appropriate sections before making your selection.

Life sciences  Behavioural & social sciences  Ecological, evolutionary & environmental sciences

For a reference copy of the document with all sections, see [nature.com/authors/policies/ReportingSummary-flat.pdf](http://nature.com/authors/policies/ReportingSummary-flat.pdf)

## Ecological, evolutionary & environmental sciences study design

All studies must disclose on these points even when the disclosure is negative.

|                          |                                                                                                                                                                                                                                                                                                                                                                                                                                                                                                                                                                    |
|--------------------------|--------------------------------------------------------------------------------------------------------------------------------------------------------------------------------------------------------------------------------------------------------------------------------------------------------------------------------------------------------------------------------------------------------------------------------------------------------------------------------------------------------------------------------------------------------------------|
| Study description        | Population genomic study of bacterial evolution in the context of the host-species                                                                                                                                                                                                                                                                                                                                                                                                                                                                                 |
| Research sample          | For selection of isolates, the literature was reviewed (date: November 2013) and all available <i>S. aureus</i> strains associated with animals and humans for which genomes had been determined were identified.                                                                                                                                                                                                                                                                                                                                                  |
| Sampling strategy        | We aimed to include isolates to represent the breadth of clonal complexes, host-species diversity, geographical locations and as wide a temporal scale as possible. Publicly available sequences were selected as follows; 74 reference genomes, 302 from the EARSS project <sup>29</sup> , and 252 from other published studies of the authors. Furthermore, to be as representative of the known <i>S. aureus</i> host, clonal, and geographic diversity as possible we selected an additional 172 isolates for whole genome sequencing (Supplementary Table 1). |
| Data collection          | sequencing of existing bacterial isolates                                                                                                                                                                                                                                                                                                                                                                                                                                                                                                                          |
| Timing and spatial scale | n/a                                                                                                                                                                                                                                                                                                                                                                                                                                                                                                                                                                |
| Data exclusions          | Isolates were excluded from the analysis for the following reasons that are indicative of contamination or poor quality sequence data; a large number of contigs and a large number of 'N's in the assemblies or genome size larger than expected for <i>S. aureus</i> (>2.9 Mb).                                                                                                                                                                                                                                                                                  |
| Reproducibility          | All findings are reproducible                                                                                                                                                                                                                                                                                                                                                                                                                                                                                                                                      |
| Randomization            | Isolates were allocated into groups according to their respective host-species. Random sub-sampling was carried out to limit the effects of sample bias.                                                                                                                                                                                                                                                                                                                                                                                                           |
| Blinding                 | n/a                                                                                                                                                                                                                                                                                                                                                                                                                                                                                                                                                                |

Did the study involve field work?  Yes  No

## Reporting for specific materials, systems and methods

### Materials & experimental systems

- | n/a                                 | Included in the study                                |
|-------------------------------------|------------------------------------------------------|
| <input checked="" type="checkbox"/> | <input type="checkbox"/> Unique biological materials |
| <input checked="" type="checkbox"/> | <input type="checkbox"/> Antibodies                  |
| <input checked="" type="checkbox"/> | <input type="checkbox"/> Eukaryotic cell lines       |
| <input checked="" type="checkbox"/> | <input type="checkbox"/> Palaeontology               |
| <input checked="" type="checkbox"/> | <input type="checkbox"/> Animals and other organisms |
| <input checked="" type="checkbox"/> | <input type="checkbox"/> Human research participants |

### Methods

- | n/a                                 | Included in the study                           |
|-------------------------------------|-------------------------------------------------|
| <input checked="" type="checkbox"/> | <input type="checkbox"/> ChIP-seq               |
| <input checked="" type="checkbox"/> | <input type="checkbox"/> Flow cytometry         |
| <input checked="" type="checkbox"/> | <input type="checkbox"/> MRI-based neuroimaging |
