# Supplementary material
Source: PubMed Central journal article supplement (PMC7610605)
Supplement: EMS78336-supplement-3.pdf [file EMS78336-supplement-3.pdf]

**Gene exchange drives the ecological success of a multi-host  
bacterial pathogen**

Emily J. Richardson<sup>1,15,16</sup>, Rodrigo Bacigalupe<sup>1,15</sup>, Ewan M. Harrison<sup>2,15</sup>, Lucy A. Weinert<sup>3,15</sup>, Samantha Lycett<sup>1</sup>, Manouk Vrieling<sup>1</sup>, Kirsty Robb<sup>4</sup>, Paul A. Hoskisson<sup>4</sup>, Matthew TG Holden<sup>5</sup>, Edward J. Feil<sup>6</sup>, Gavin K. Paterson<sup>7</sup>, Steven YC Tong<sup>8</sup>, Adebayo Shittu<sup>9</sup>, Willem van Wamel<sup>10</sup>, David M. Aanensen<sup>11</sup>, Julian Parkhill<sup>12</sup>, Sharon J. Peacock<sup>13</sup>, Jukka Corander<sup>12,14</sup>, Mark Holmes<sup>3</sup>, and J. Ross Fitzgerald<sup>1\*</sup>

**Supplementary Figures 1-19**

**Supplementary Tables 1-12**

**Supplementary Notes**

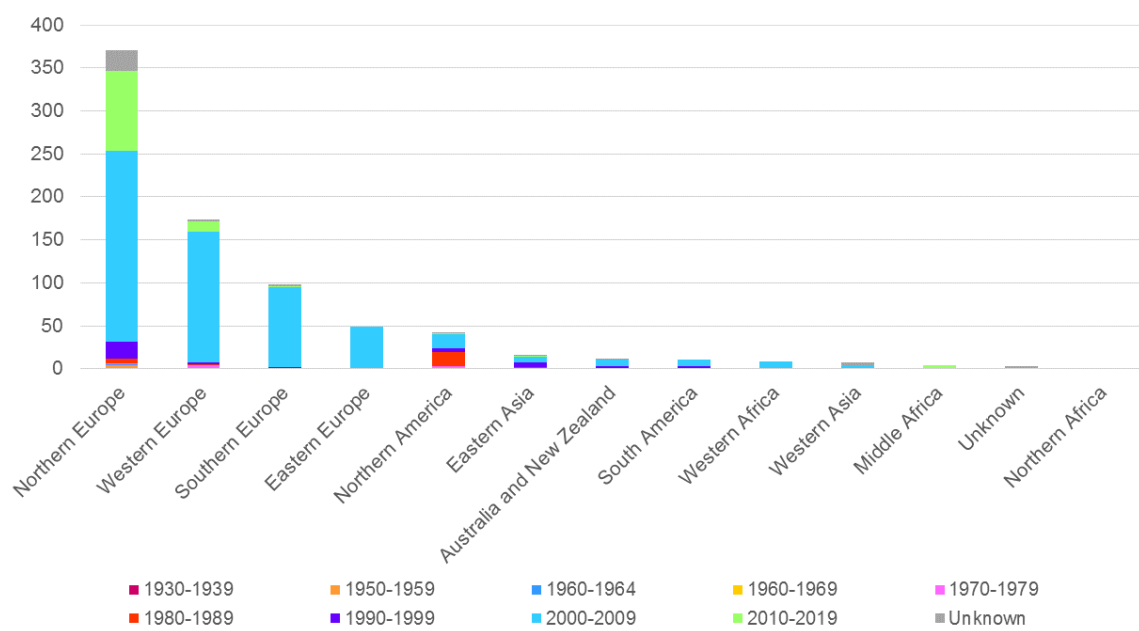

**Supplementary Figure 1. Distribution of isolates by geographical region and date of isolation.**

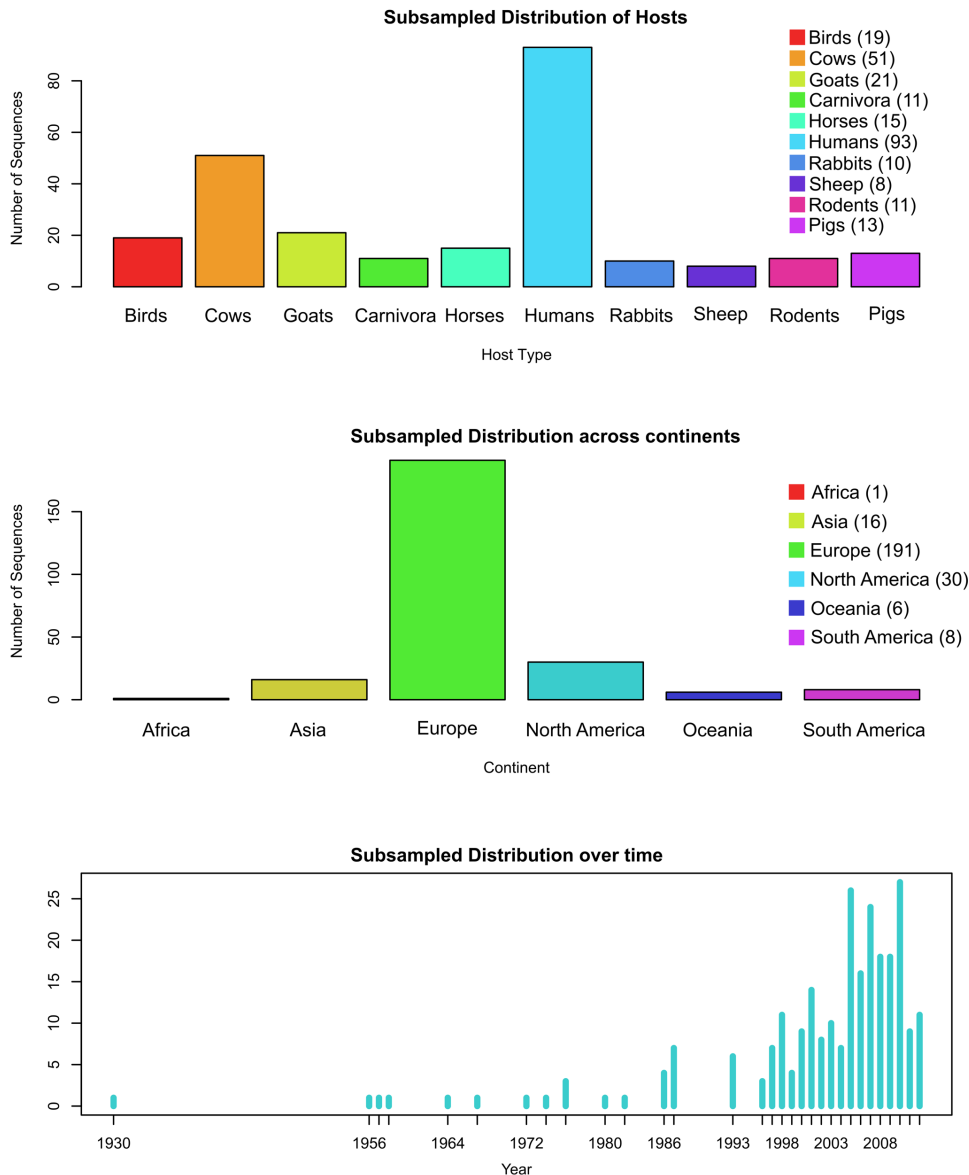

**Supplementary Figure 2. Distribution of *S. aureus* genome sequences in subsampled data set for BEAST analysis.** The unclassified sequences were omitted from the original set of 696 sequences, and the remainder were sub-sampled in order to reduce over-representation of some of the host-types (especially human and cow) but retain spatial and temporal diversity. 10 random subsamples were drawn from the data set (with replacement), with a maximum of 5 sequences per host-type per continent per year of sampling. Each subsample had the same distribution sequences for hosts, continents and years.

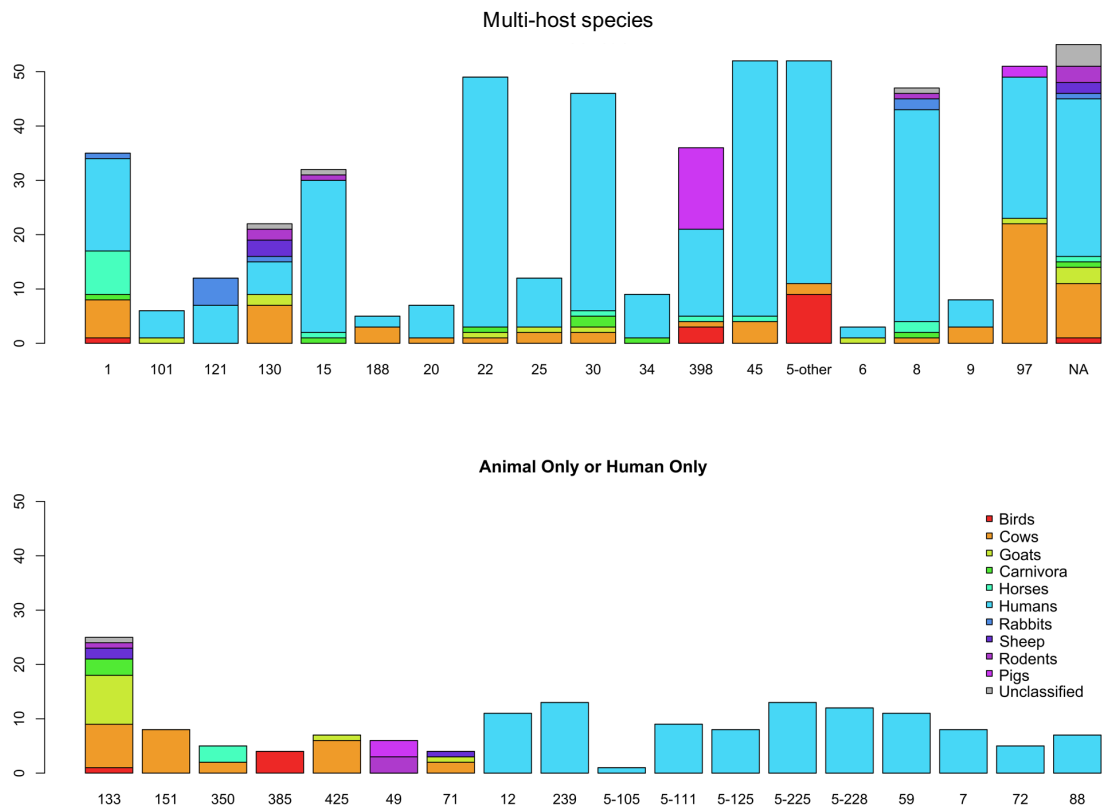

**Supplementary Figure 3. *S. aureus* clonal complex composition by host species.** Distribution of the number of sequences in the original set of 696 sequences by host type and clonal complex, including sequences not assigned to a clade (NA) and sequences not classified into a main host type (unclassified, grey).

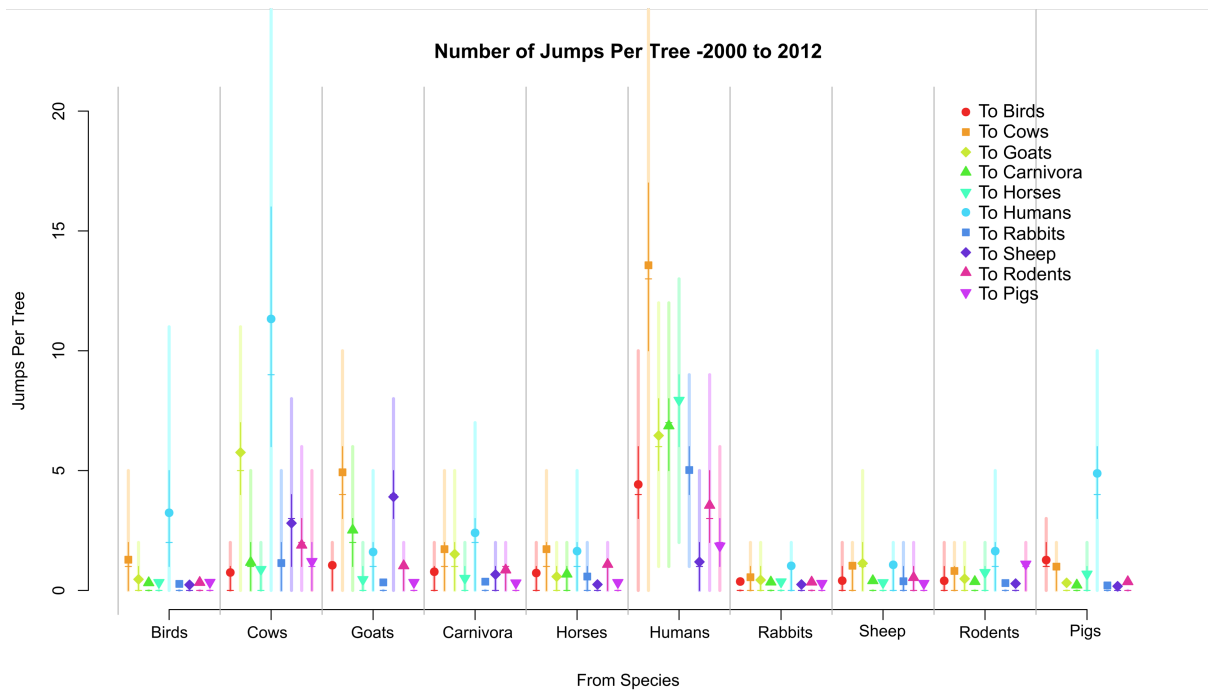

**Supplementary Figure 4. Number of host jumps per tree as distributions from all subsamples and trees.** The points represent the mean values and the small horizontal bars are the medians, the darker lines are the interquartile range and the pale background lines are the whisker limits.

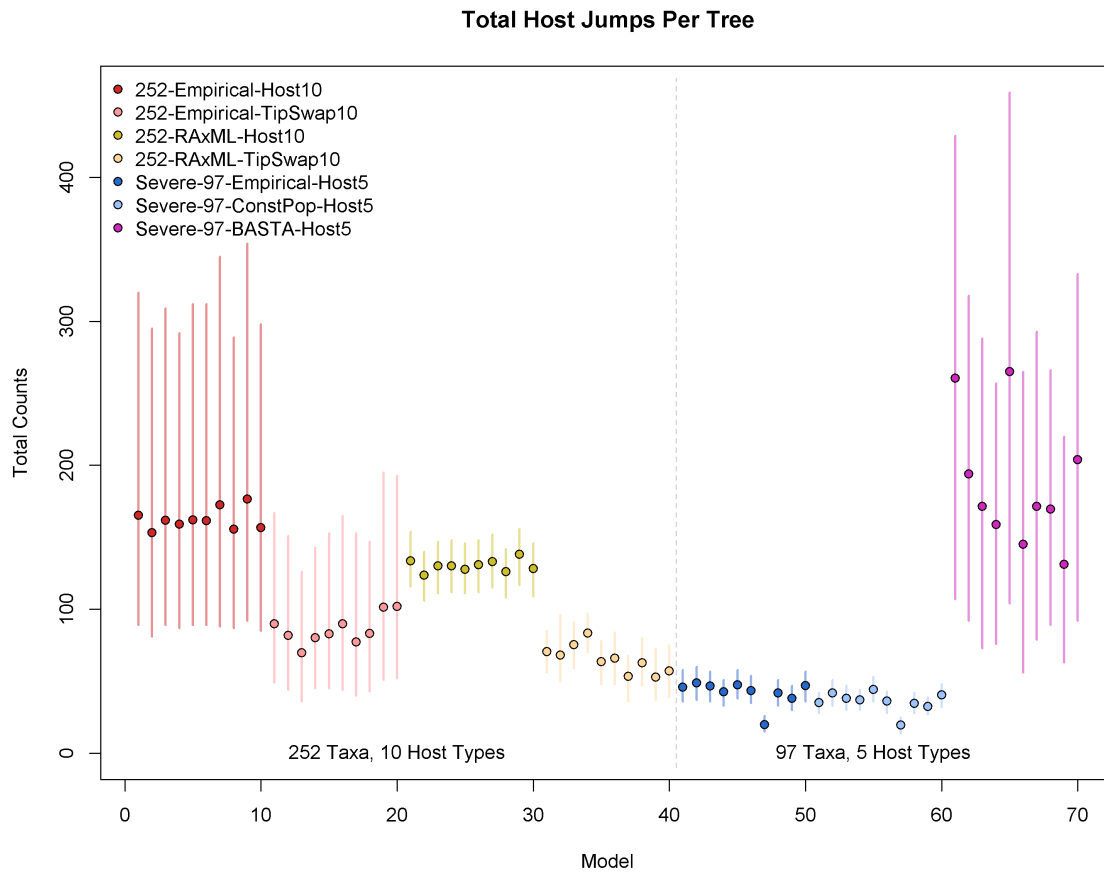

**Supplementary Figure 5. Comparison of total number of host jumps between sets of 10 subsamples and models.** ‘TipSwap’ refers to models in which the tip labels are permuted (randomised) during the MCMC steps. The total number of host jumps across the trees are similar for the time-scaled trees and RAxML trees (red and yellow), however the number of jumps inferred under BASTA (purple) seem to be much higher than the corresponding discrete traits analysis on the same data (blues).

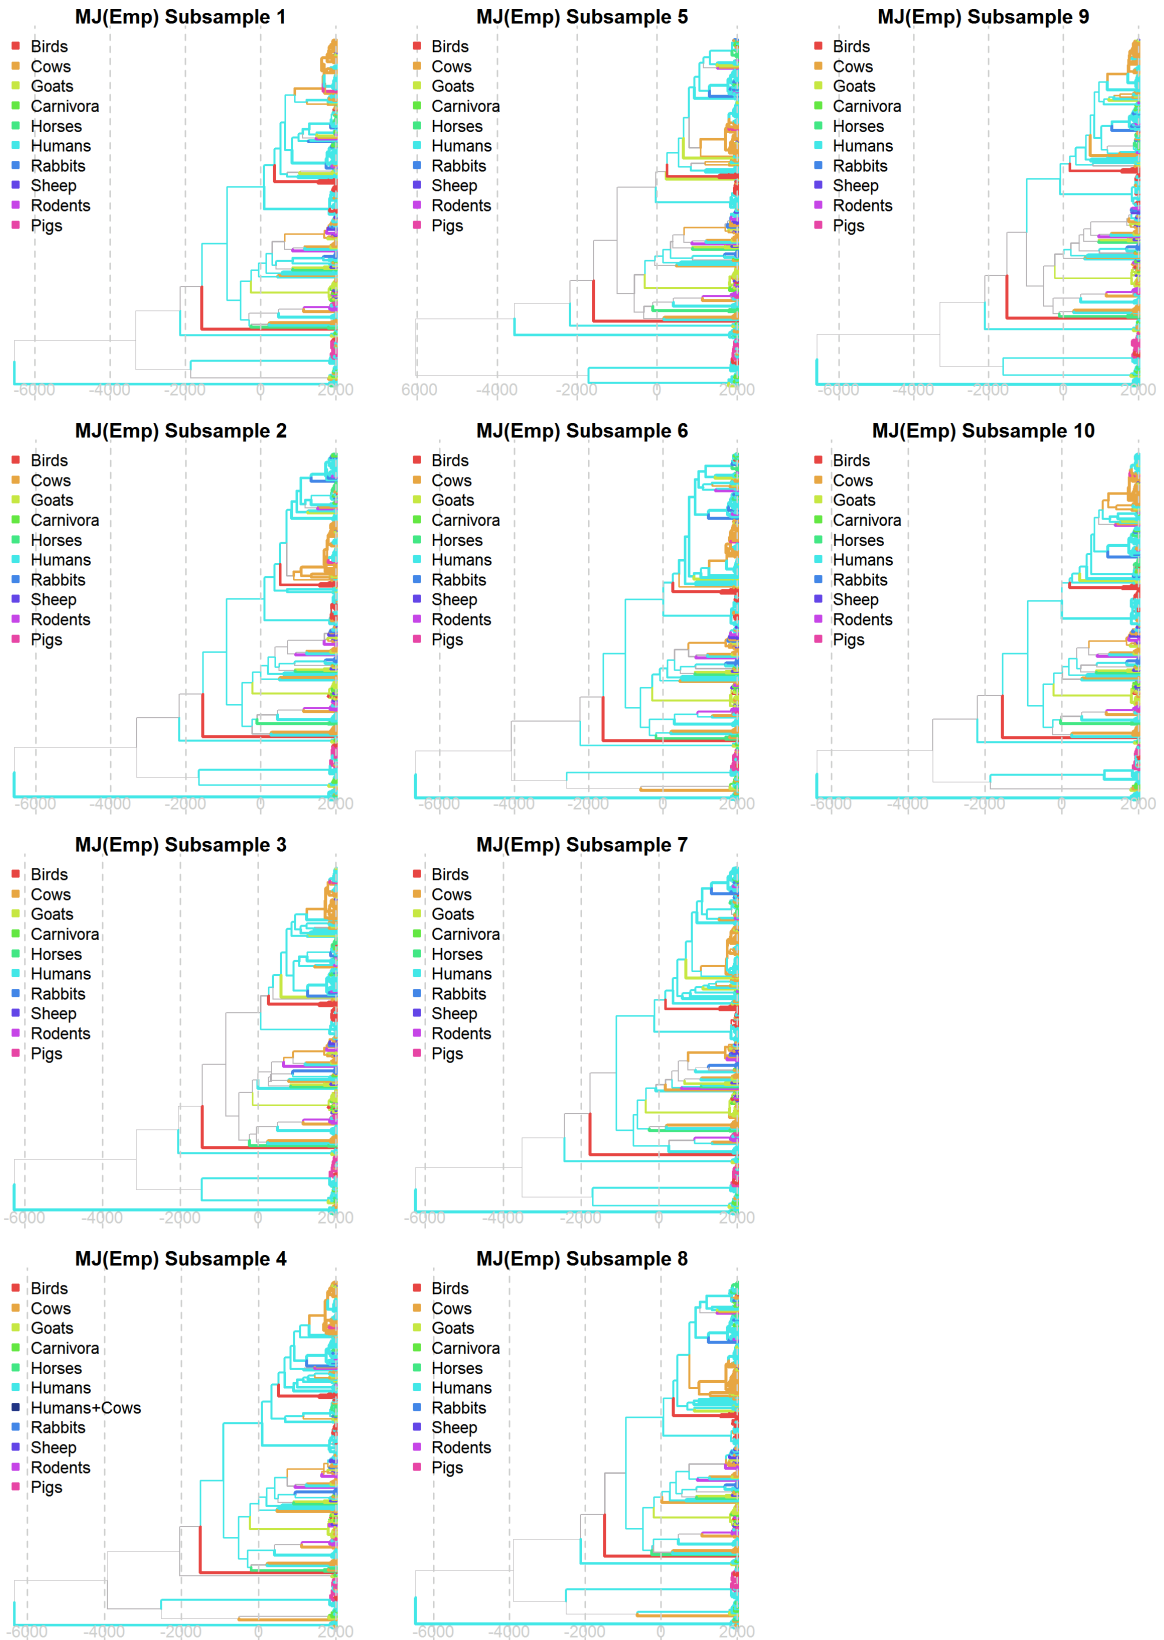

**Supplementary Figure 6. BEAST analysis with 10 subsamples, 252 taxa, MCC Trees with 10 Host-type reconstruction using Discrete Trait Markov Jumps asymmetric model (empirical trees).**

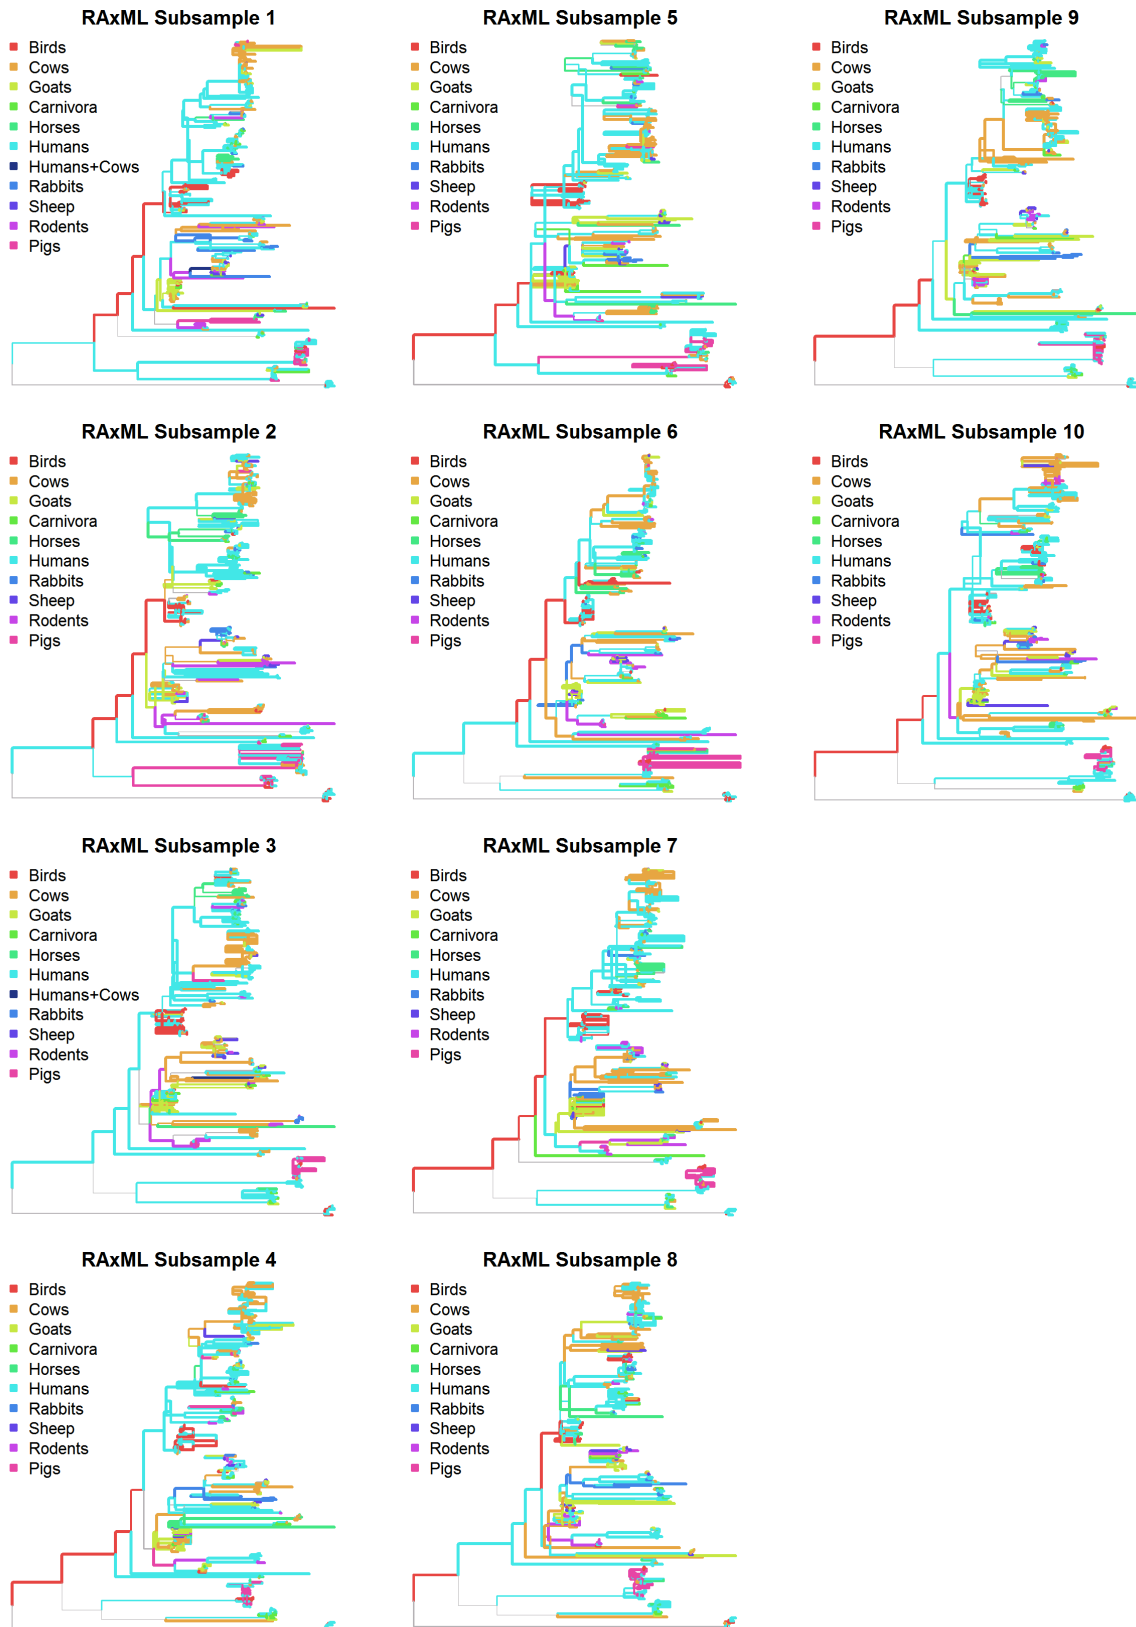

**Supplementary Figure 7. BEAST analysis with 10 subsamples, 252 taxa, RAxML (Maximum Likelihood) Trees with 10 Host-type reconstruction using Discrete Trait Markov Jumps asymmetric model**



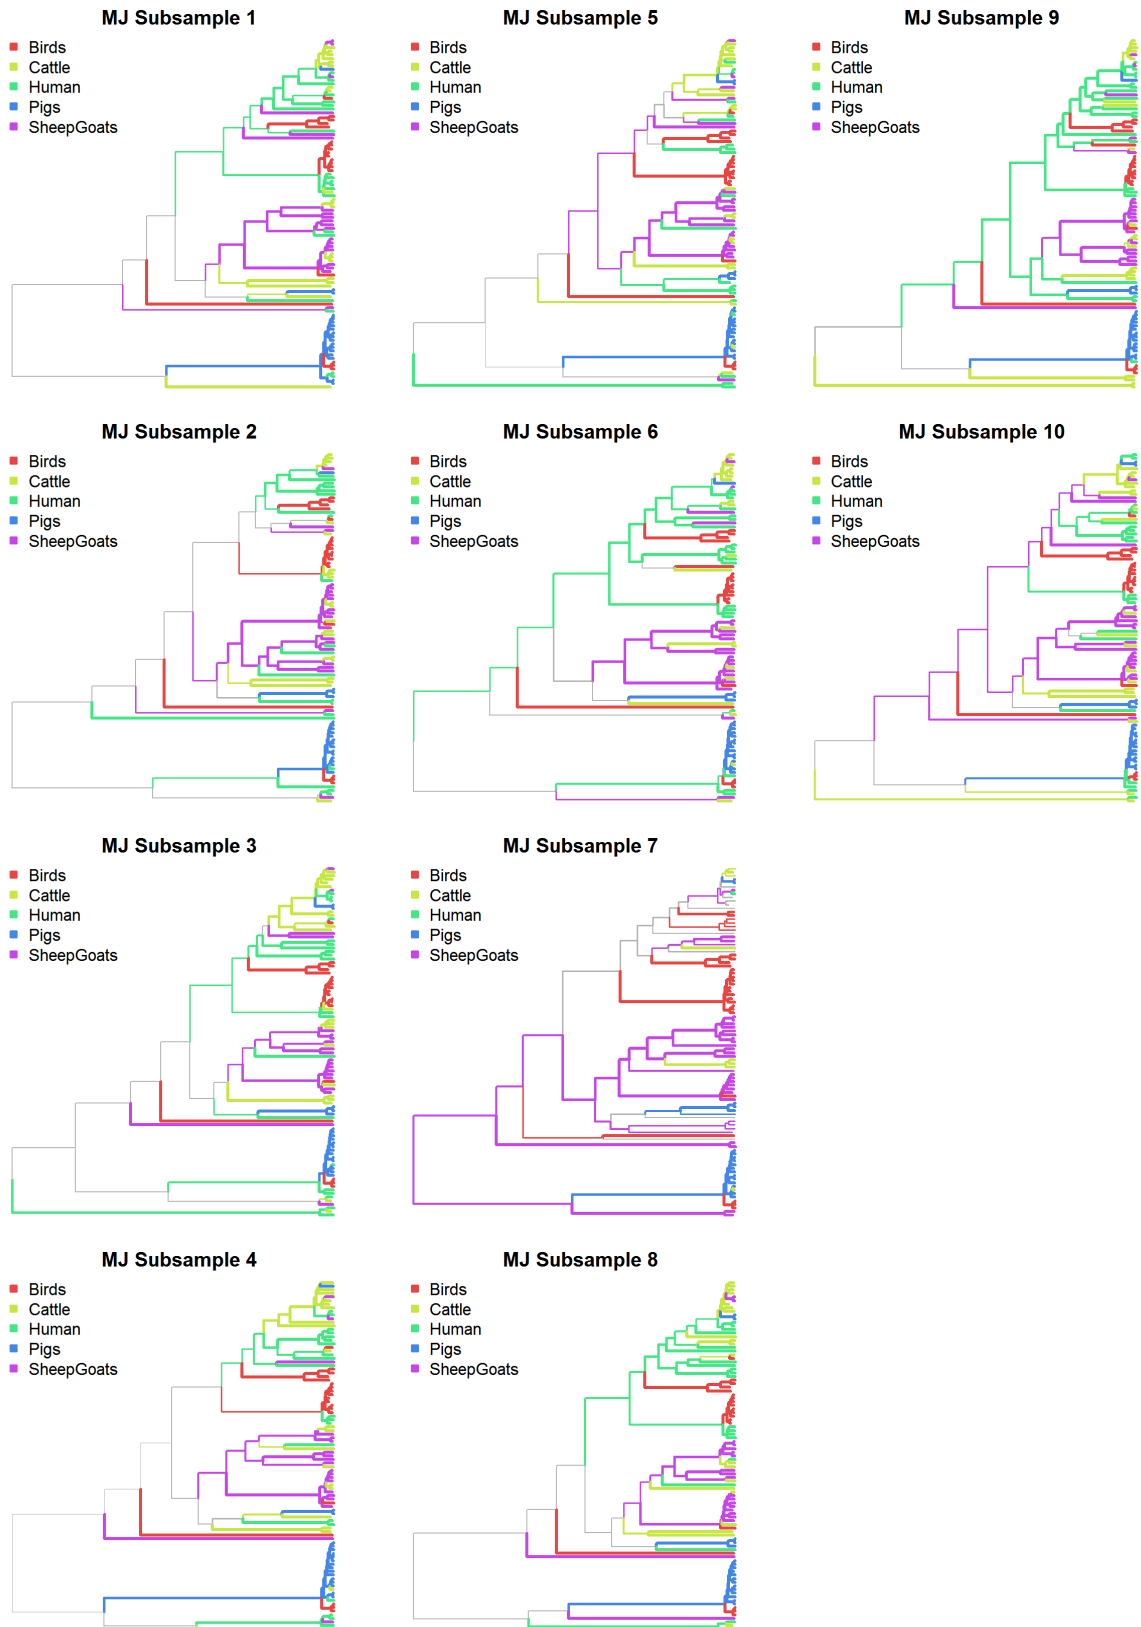

**Supplementary Figure 8. 10 severe subsamples, 97 taxa, BEAST MCC Trees, with 5 Host-type reconstruction using Discrete Trait Markov Jumps asymmetric model (joint inference).**

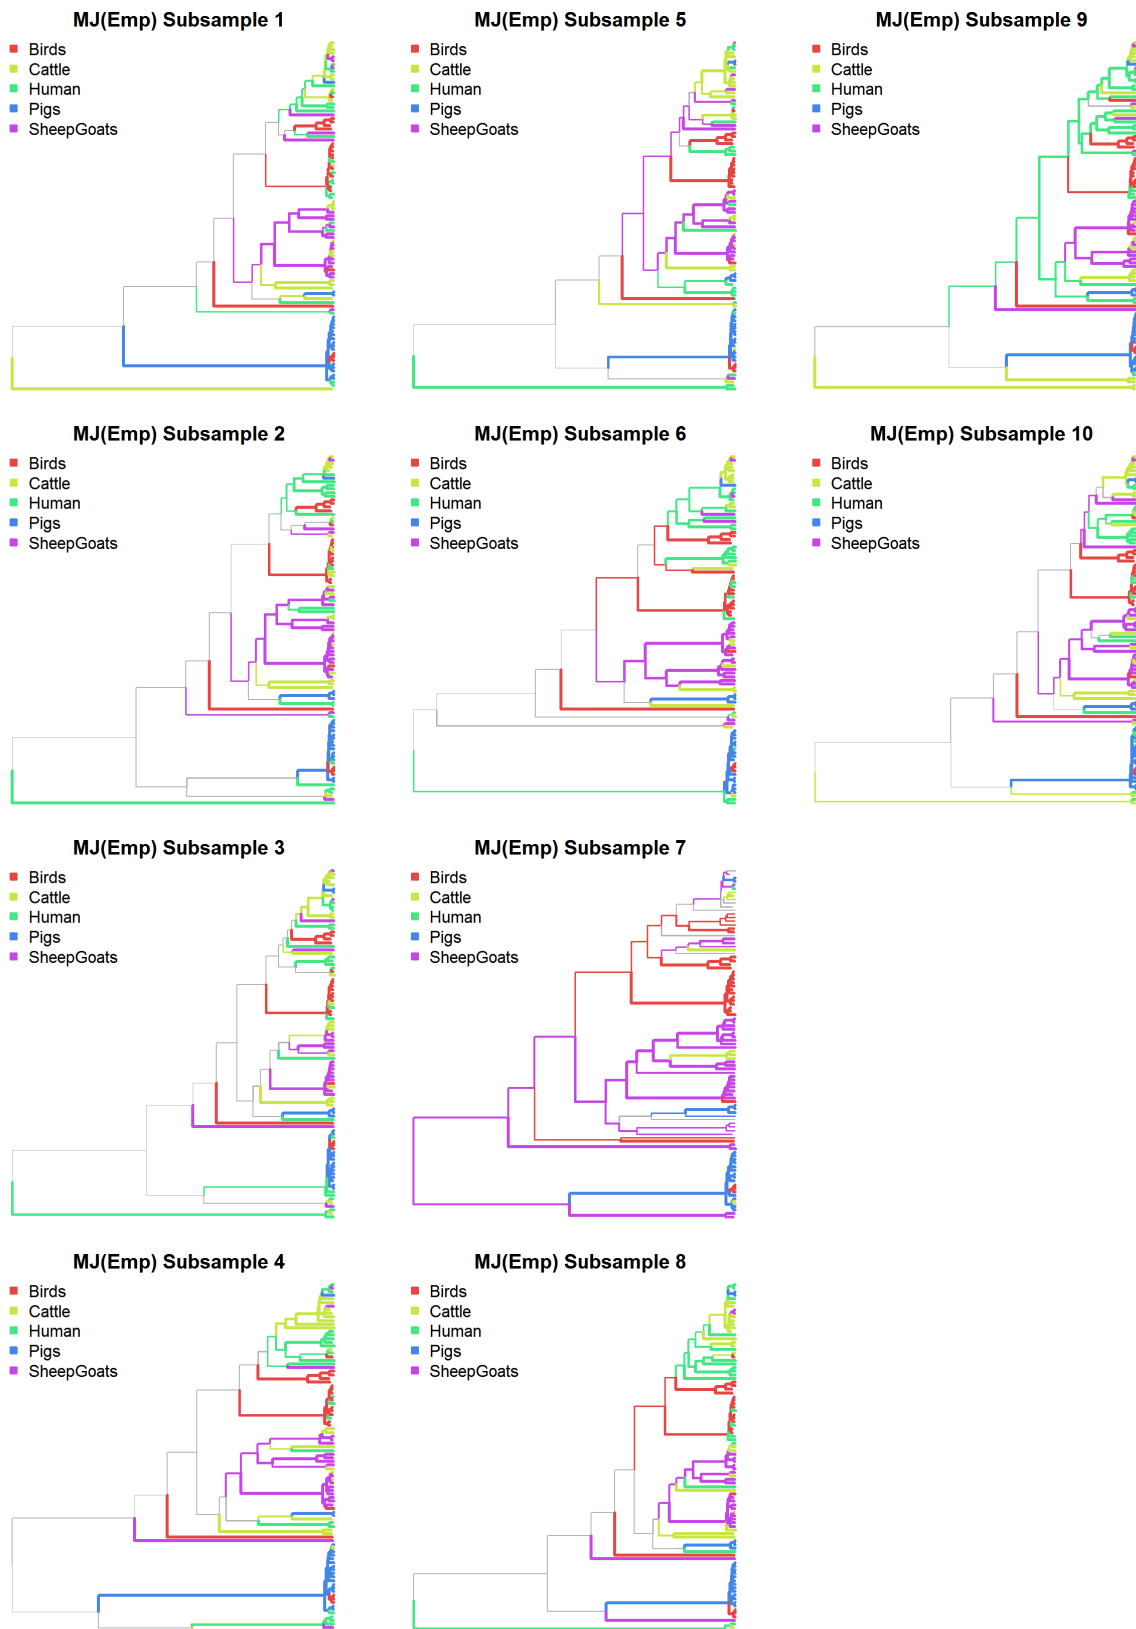

**Supplementary Figure 9. 10 severe subsamples, 97 taxa, BEAST MCC Trees, with 5 Host-type reconstruction using Discrete Trait Markov Jumps asymmetric model (empirical trees).**

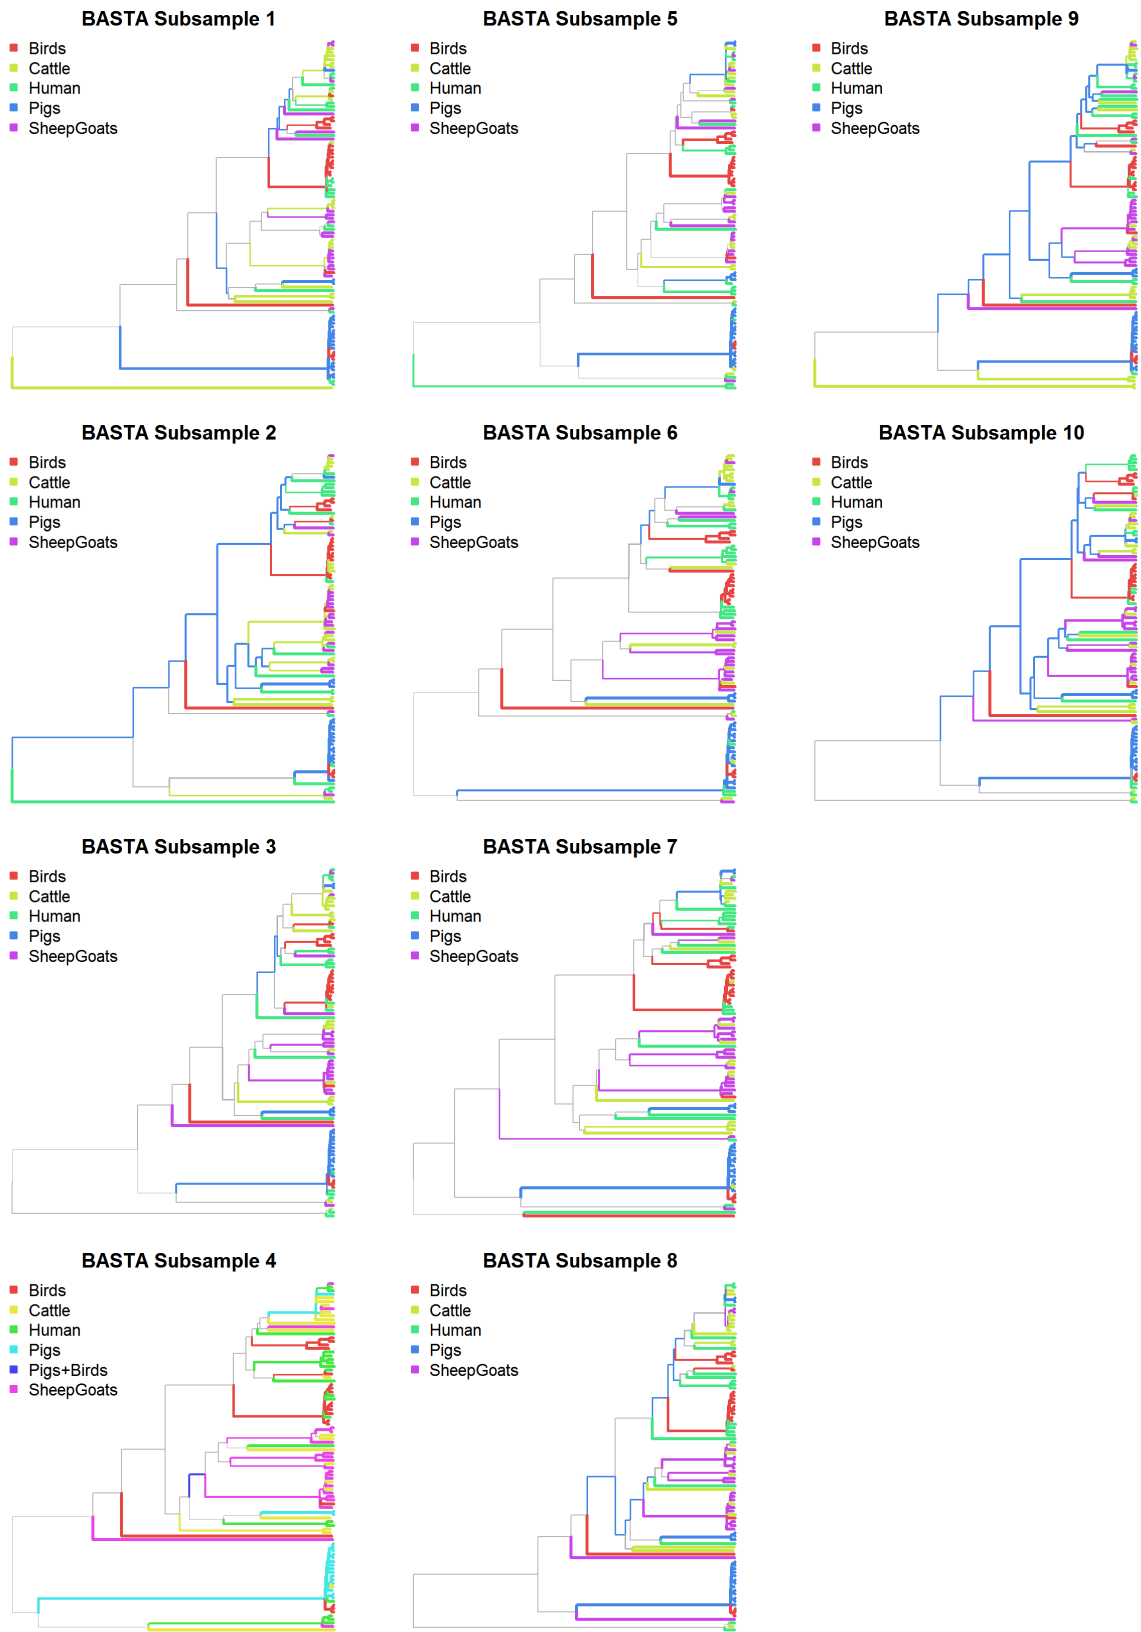

**Supplementary Figure 10. 10 severe subsamples, 97 taxa, BEAST-BASTA MCC Trees, with 5 Host-type reconstruction (approximate structured coalescent).**

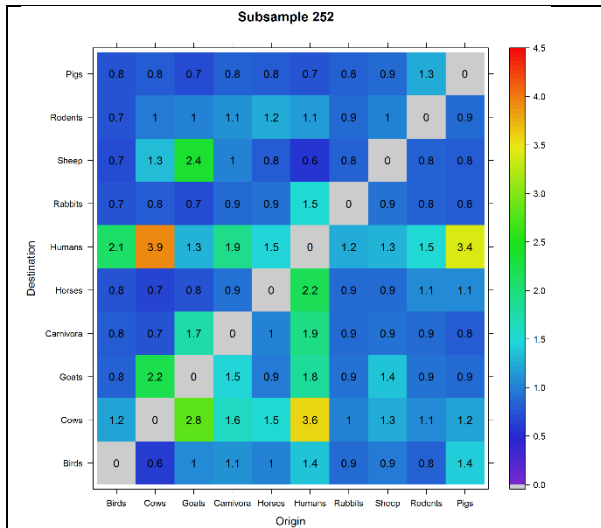

252 taxa subsamples 1-10

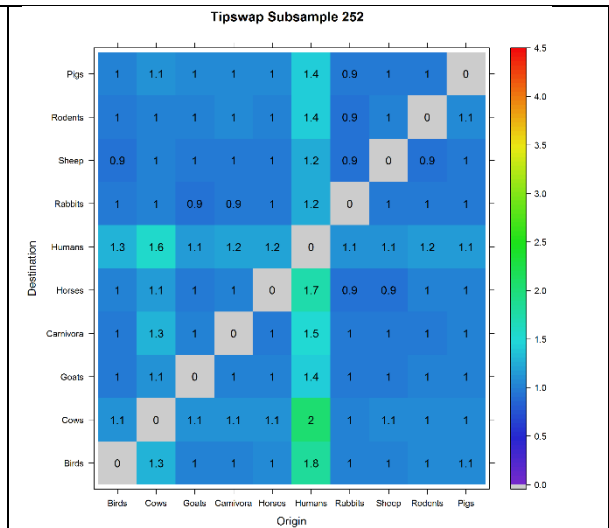

252 taxa subsamples 1-10 with tipswap

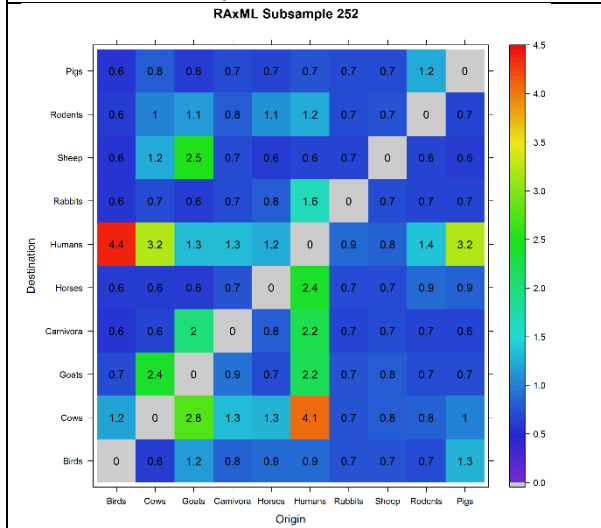

252 taxa subsamples with RAxML trees

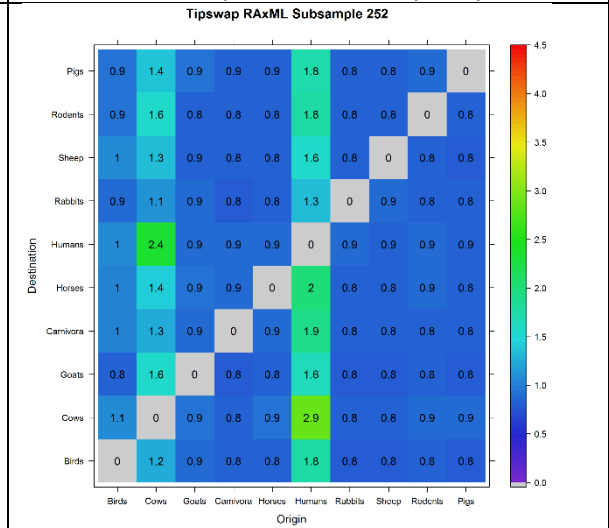

252 subsamples with RAxML trees and tipswap

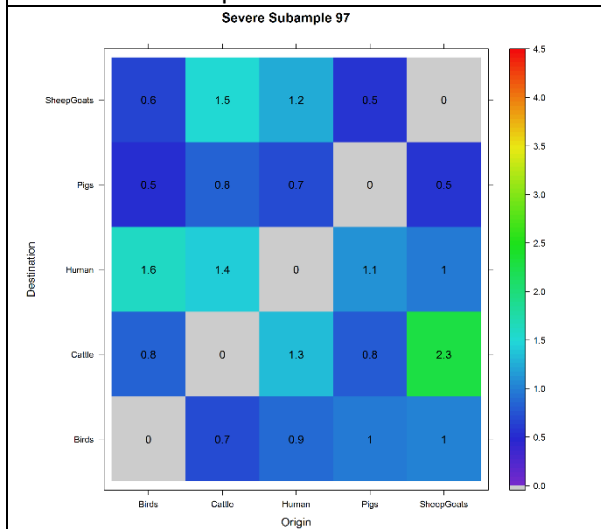

97 taxa severe subsamples empirical and constant population (no difference at this scale)

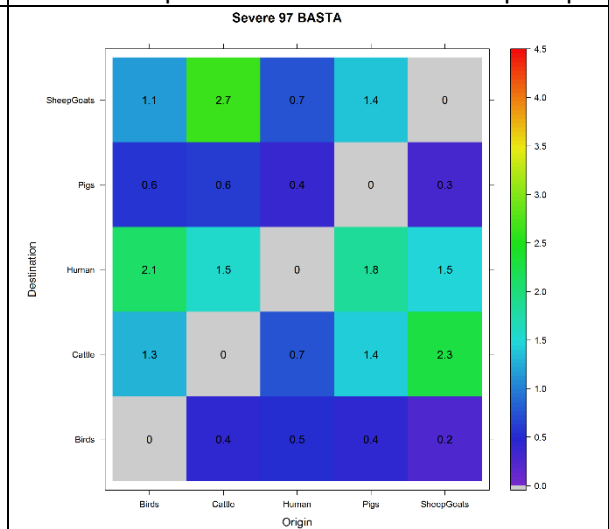

97 taxa severe subsamples BASTA

**Supplementary Figure 11. Relative Rate Matrices for Host JumpTransitions**

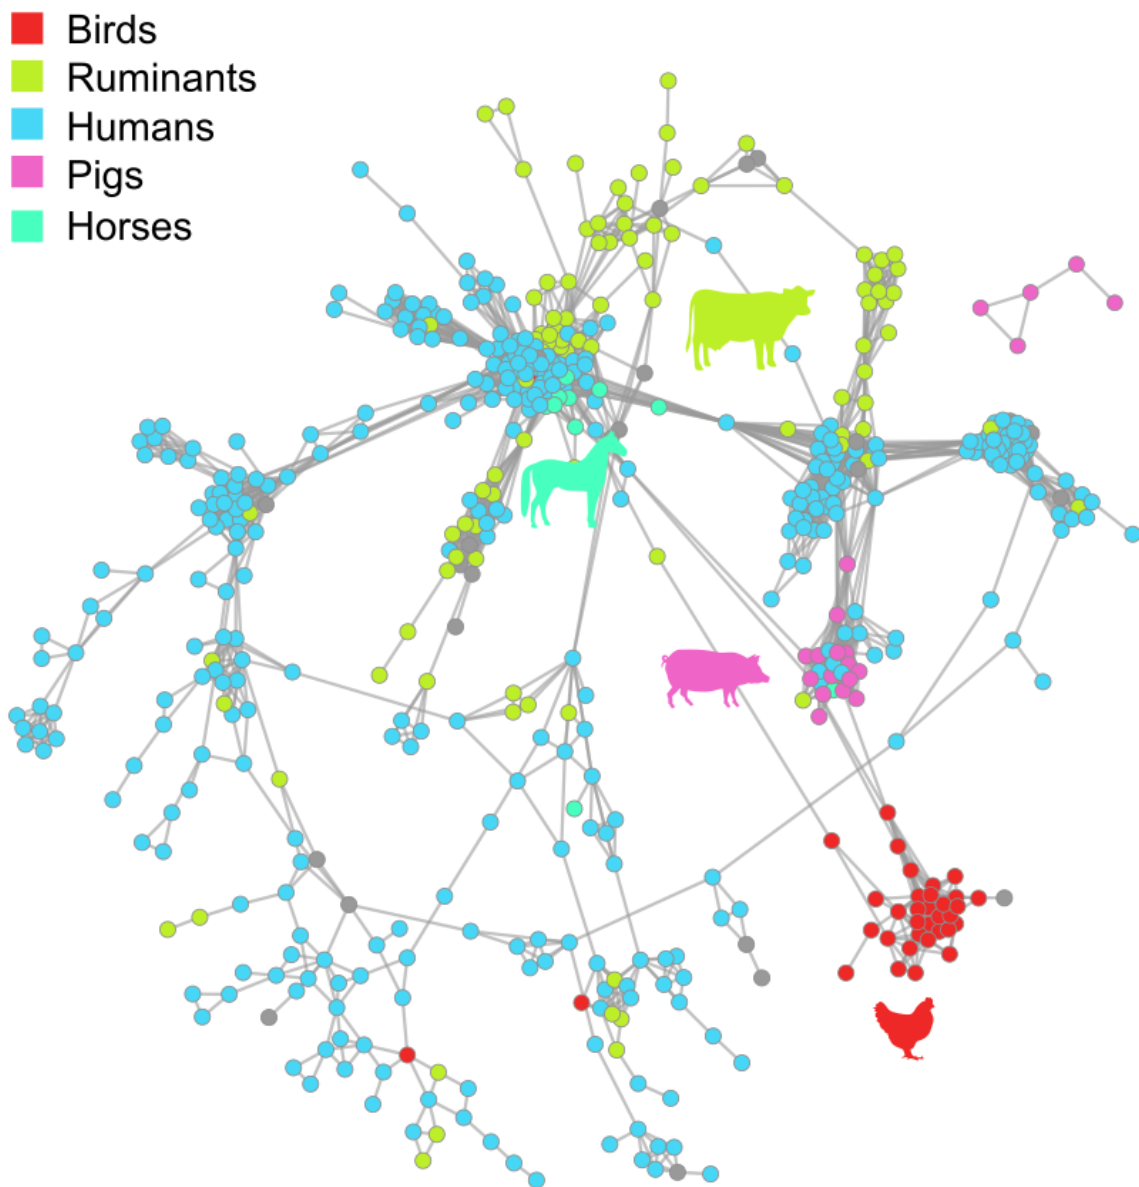

**Supplementary Figure 12. Accessory genome correlation network based on pairwise distance matrix with antibiotic resistance determinants removed.** As a result of removing antibiotic associated genes the pig genomes from ST97 and ST49 no longer cluster with pig ST398. Further, the horse genomes no longer cluster in a separate group together, rather they are more closely-allied to a large multi-host associated cluster. Edges are cut off with a distance threshold of 0.5 (all edges represent relationship with 50% identity or greater). The length of the edges is weighted by distance (the shorter the edge the more closely related the accessory genomes are).

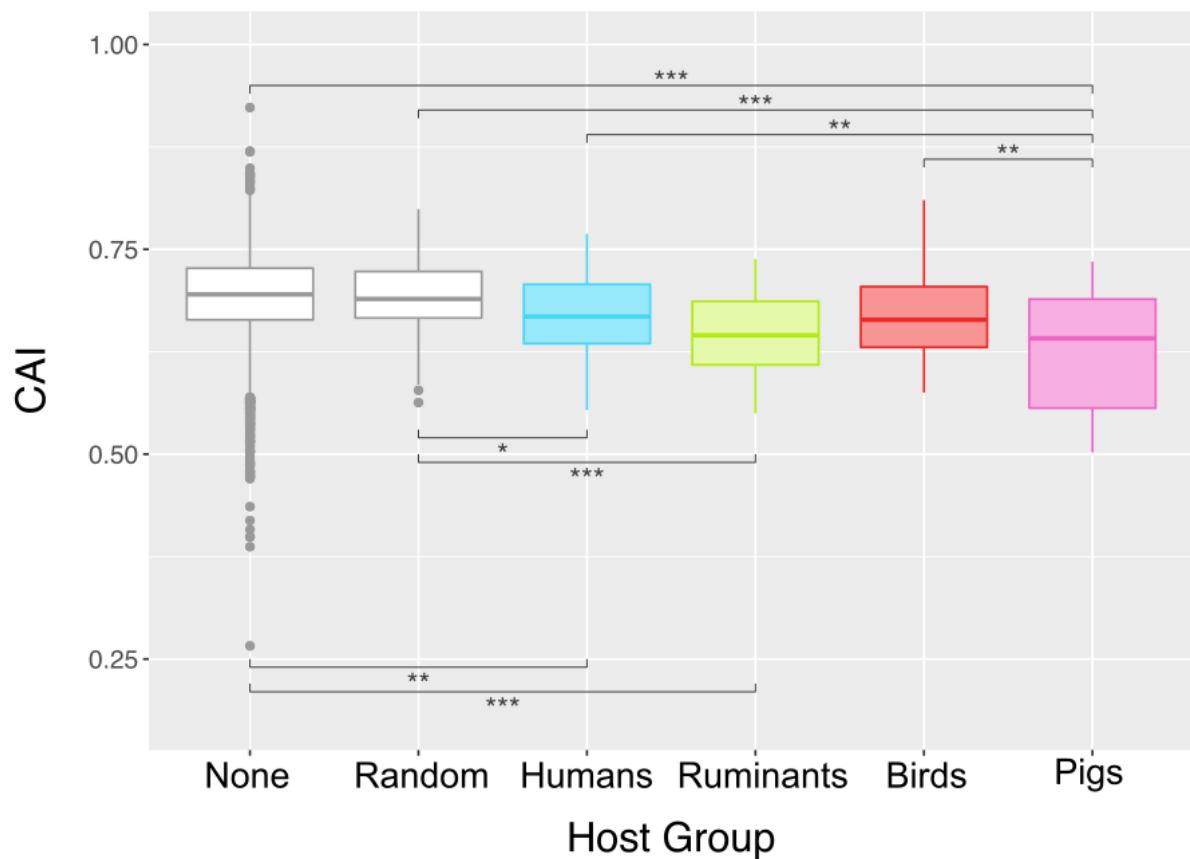

**Supplementary Figure 13. Comparison of codon adaptation index (CAI) values for host-specific accessory genomes.** Host group 'None' represents all other genomes (ie not associated with the explicitly stated host groups). 'Random' represents a control of five randomly selected sets of 50 core genes from the 'None' group, to demonstrate that host-specific accessory genome CAI values are not different by random chance. P-values are shown as \*, \*\* and \*\*\*, representing p-values of 0.05, 0.01 and <0.001 respectively.

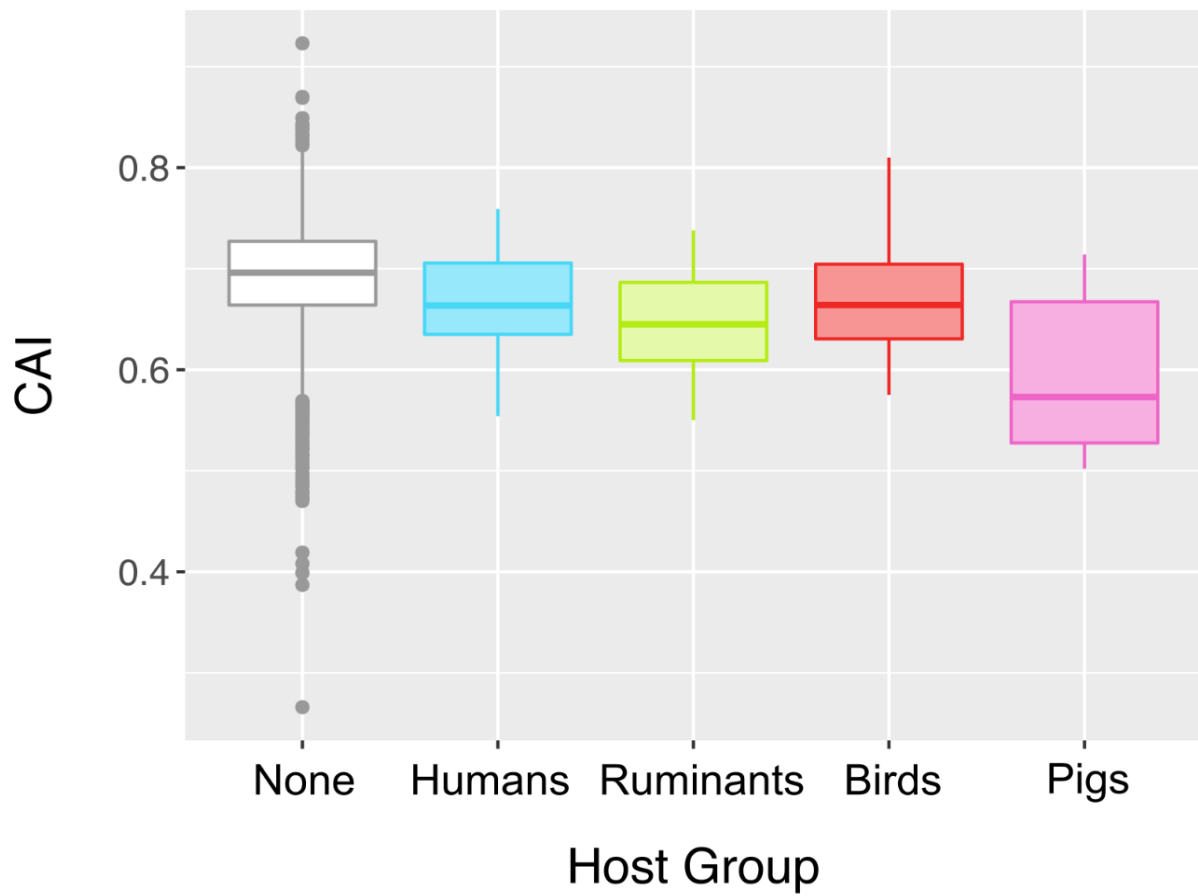

**Supplementary Figure 14. Comparison of codon adaptation index (CAI) values for host jump associated accessory genomes after removal of antibiotic resistance genes.**

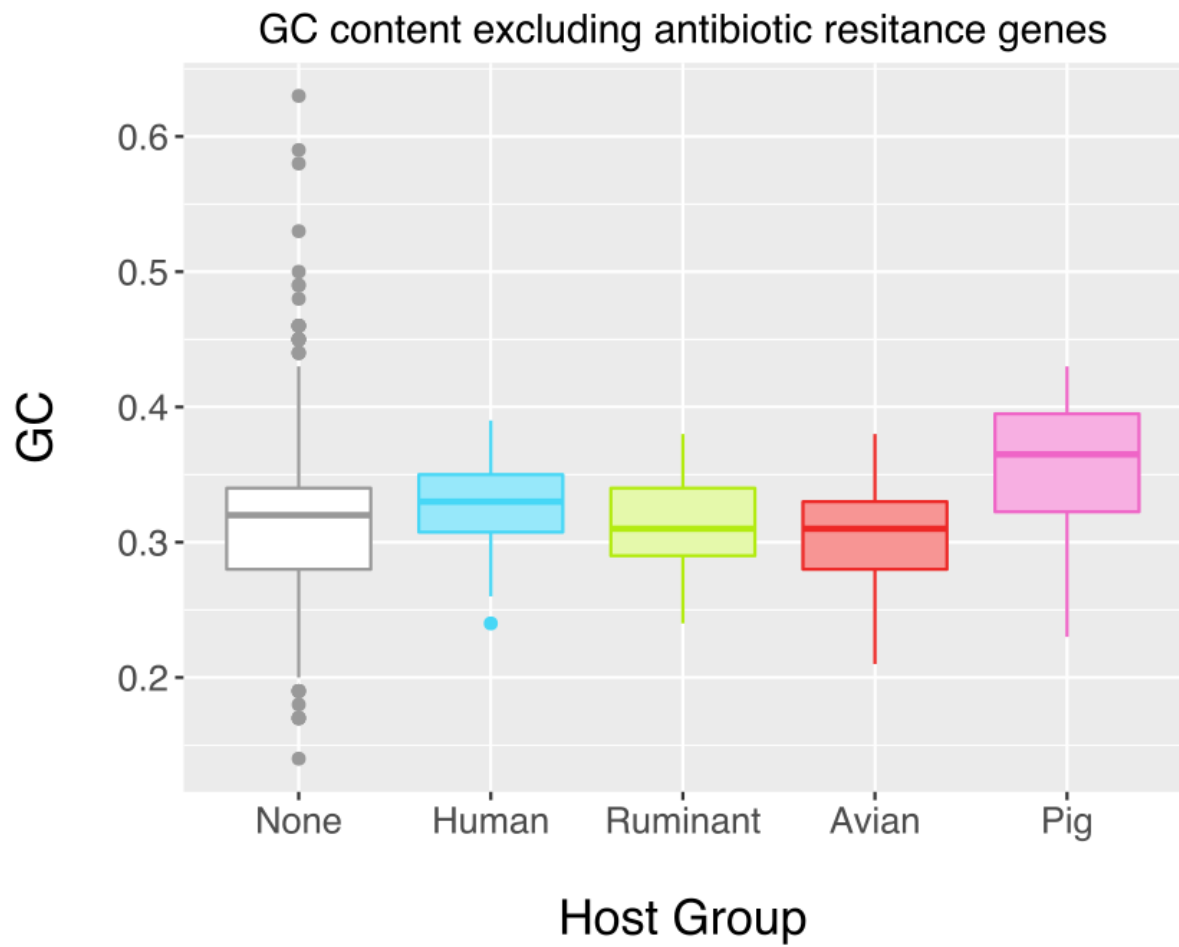

**Supplementary Figure 15.** GC content of accessory genomes grouped according to host-species association.



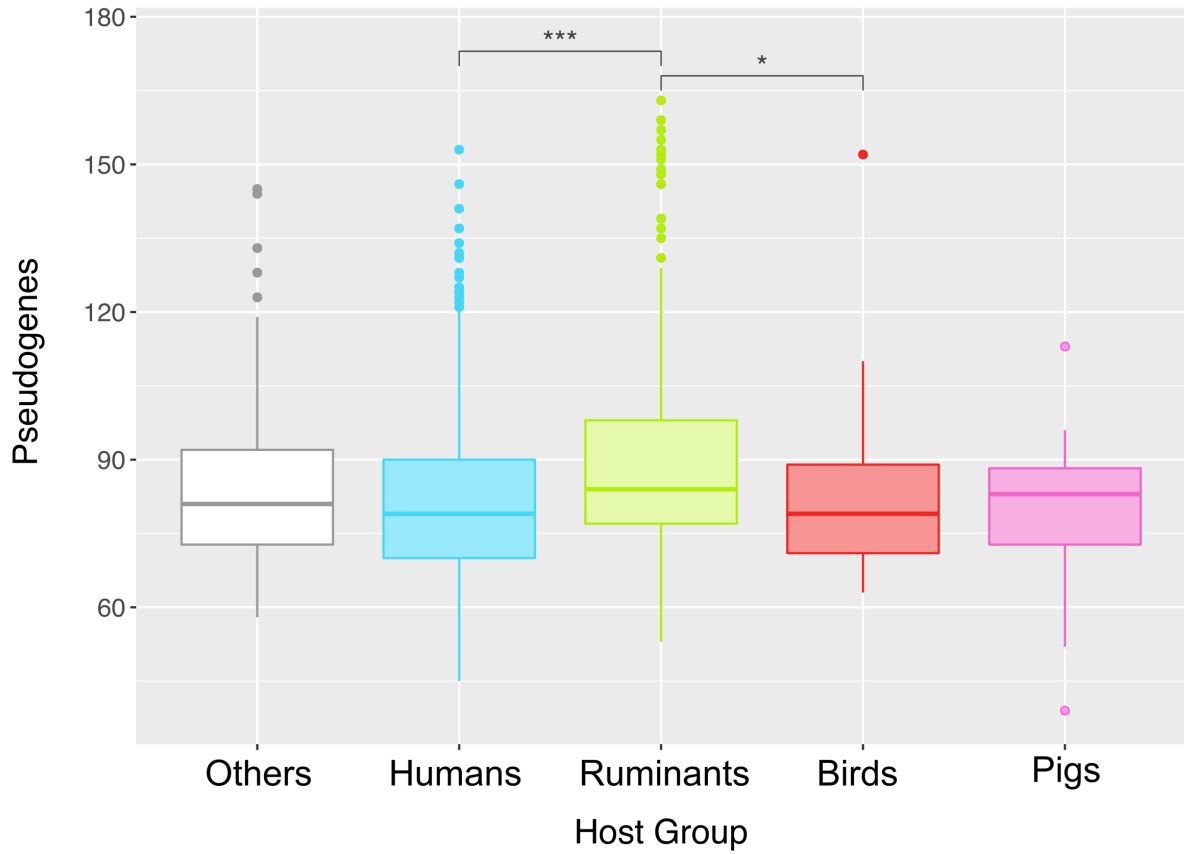

**Supplementary Figure 16. Comparison of pseudogene counts by genome according to host species group.** The number of pseudogenes in ruminant genomes is significantly higher than birds and human host groups. P-values are shown as \*, \*\* and \*\*\*, representing p-values of 0.05, 0.01 and <0.001 respectively.

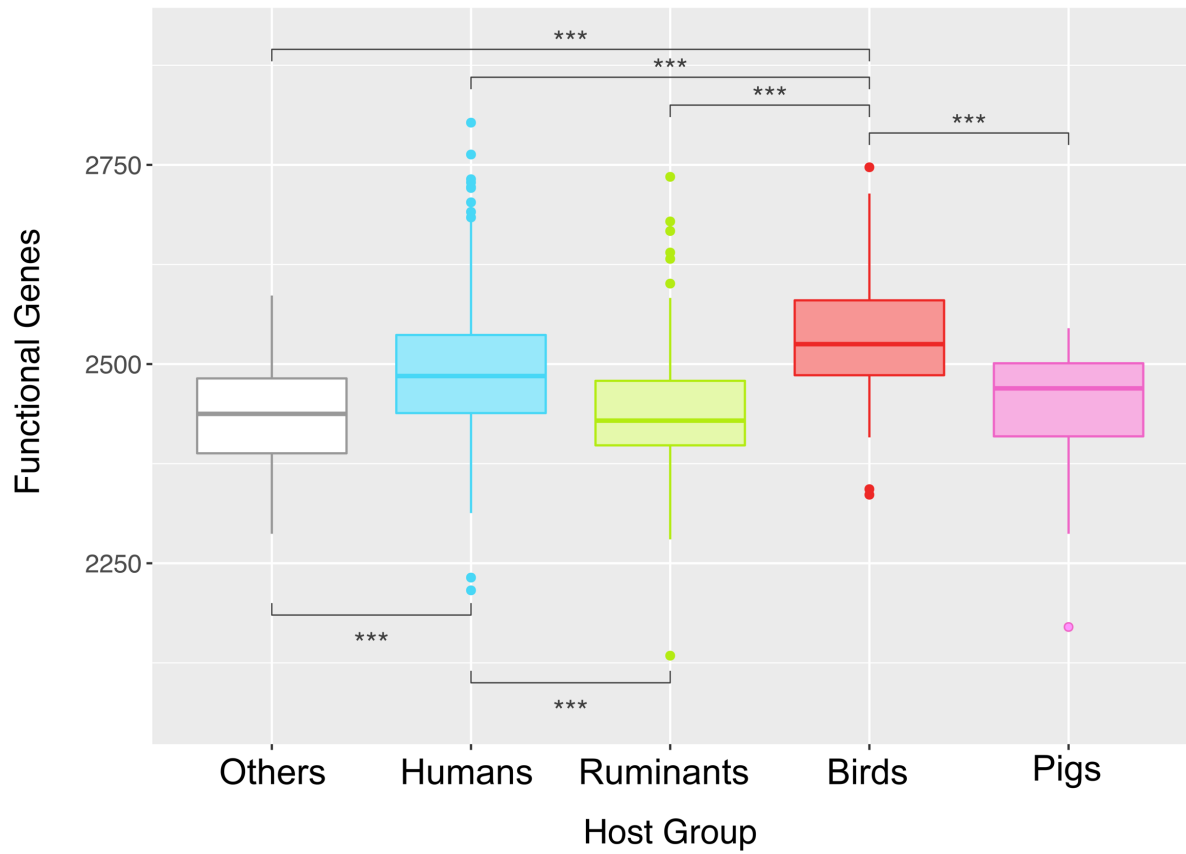

**Supplementary Figure 17. Box and whisker plot representing the number of functional genes per genome, organized by host group.** Birds functional gene count is significantly higher than all other host groups. P-values are shown as \*, \*\* and \*\*\*, representing p-values of 0.05, 0.01 and <0.001 respectively.

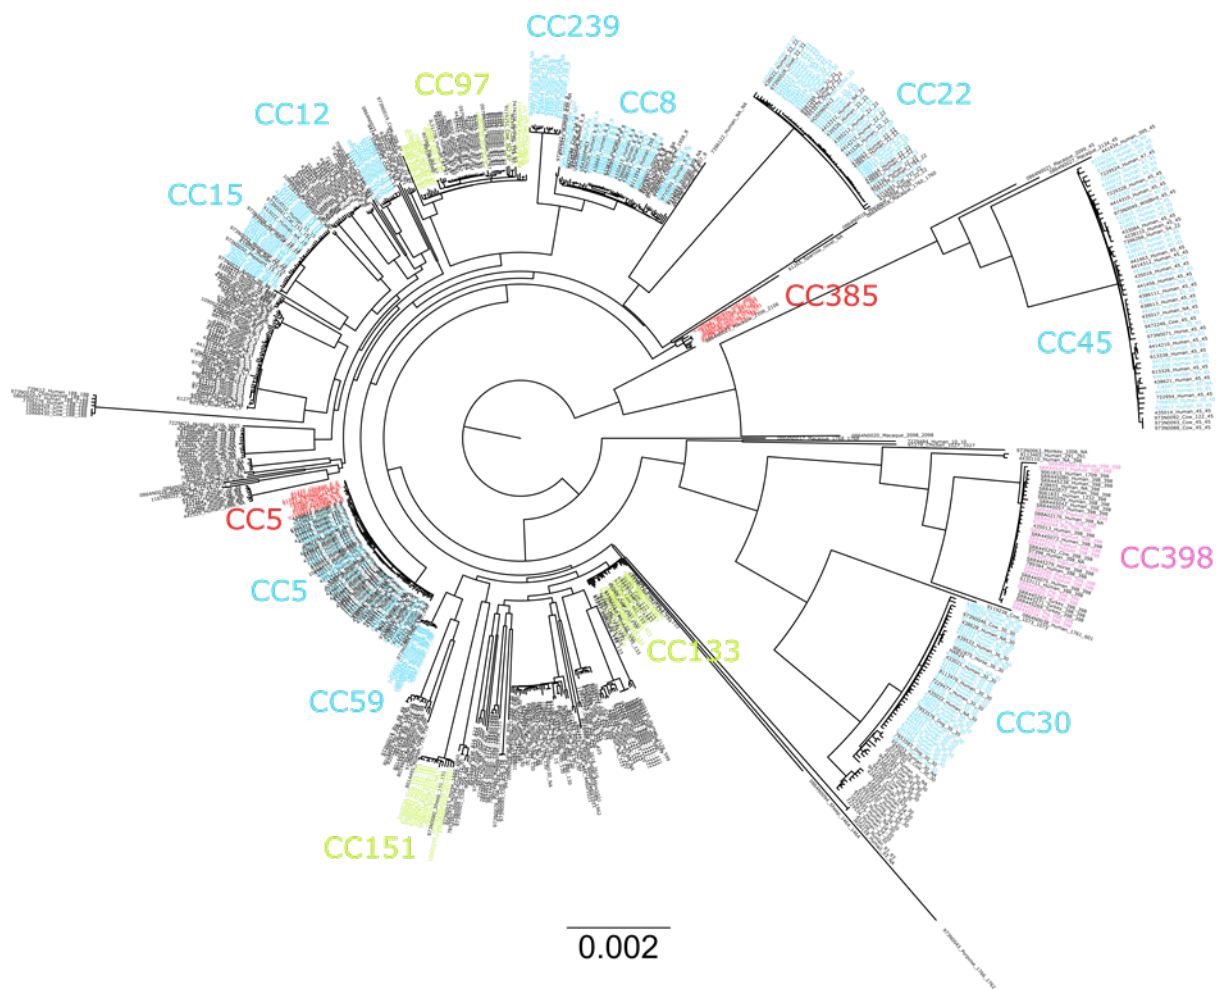

**Supplementary Figure 18.** Isolates selected for positive selection analysis indicated by colored text with clonal complex annotated on the Maximum-likelihood tree.

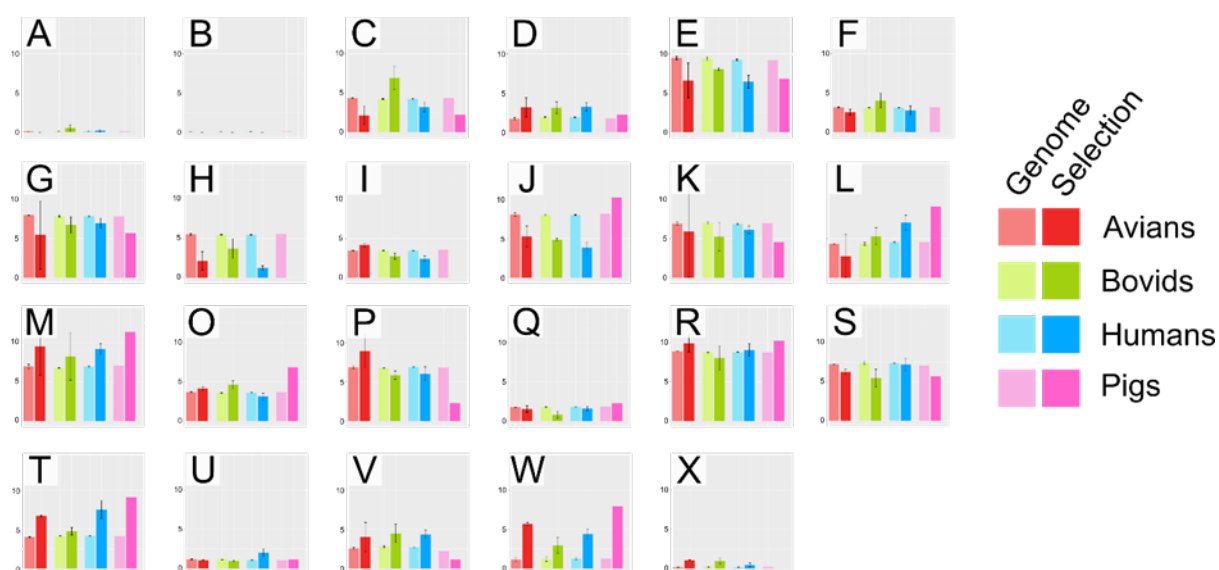

- A** - RNA processing and modification
- B** - Chromatin structure and dynamics
- C** - Energy production and conversion
- D** - Cell cycle control, cell division, chromosome partitioning
- E** - Amino acid transport and metabolism
- F** - Nucleotide transport and metabolism
- G** - Carbohydrate transport and metabolism
- H** - Coenzyme transport and metabolism
- I** - Lipid transport and metabolism
- J** - Translation, ribosomal structure and biogenesis
- K** - Transcription
- L** - Replication, recombination and repair
- M** - Cell wall/membrane/envelope biogenesis
- O** - Posttranslational modification, protein turnover, chaperones
- P** - Inorganic ion transport and metabolism
- Q** - Secondary metabolites biosynthesis, transport and catabolism
- R** - General function prediction only
- S** - Function unknown
- T** - Signal transduction mechanisms
- U** - Intracellular trafficking, secretion, and vesicular transport
- V** - Defense mechanisms
- W** - Extracellular structures
- X** - Mobilome: prophages, transposons

**Supplementary Figure 19.** Differences in Clusters of Orthologous Groups for genes under positive selection in different hosts compared to the pangenome.

**Supplementary Table 1. Metadata for all *S. aureus* isolates examined in the current study.**

**Supplementary Table 2: Substitution rate priors (x 10<sup>-6</sup> nucleotides/site/year) used for dating analysis.**

| phylogroup | median | 95%HPD |      | sample size | reference                 |
|------------|--------|--------|------|-------------|---------------------------|
| ST22-A     | 1.27   | 1.15   | 1.41 | 162         | {Holden, 2013 #127}       |
| ST239      | 2.25   | 1.199  | 2.52 | 63          | {Harris, 2010 #116}       |
| CC8        | 1.8    | 1.2    | 2.4  | 174         | {Strommenger, 2014 #2502} |
| ST225      | 2      | 1.2    | 2.9  | 73          | {Nübel, 2010 #218}        |
| CC30       | 1.42   | 1.04   | 1.8  | 87          | {McAdam, 2012 #562}       |
| ST8        | 1.22   | 0.604  | 1.86 | 387         | {Uhlemann, 2014 #2312}    |

**Supplementary Table 3: Classification of isolates into host-species groups for BEAST analysis.**

| Host classification* | Number of Samples | Further descriptors                                                                 |
|----------------------|-------------------|-------------------------------------------------------------------------------------|
| Birds                | 19                | 1: corn crane<br>1: chaffinch<br>14: chicken<br>3: turkey                           |
| Cows                 | 92                |                                                                                     |
| Goats                | 22                |                                                                                     |
| Carnivores           | 11                | 5: dog<br>3: cat<br>2: mongoose<br>1: lion                                          |
| Horses               | 18                |                                                                                     |
| Humans               | 477               |                                                                                     |
| Rabbits              | 10                | 1: mountain hare<br>9: rabbit                                                       |
| Sheep                | 8                 |                                                                                     |
| Rodents              | 11                | 1: guinea pig<br>3: mara<br>1: capybara<br>6: red squirrel                          |
| Pigs                 | 20                |                                                                                     |
| Unclassified         | 8                 | 3: fruit bat<br>1: hedgehog<br>1: zoo chimpanzee<br>2: harbour porpoise<br>1: tapir |
| total                | 696               |                                                                                     |

\*The sequences were grouped into 10 host types with each group containing at least 5 isolates. 8 sequences were grouped as 'unclassified' and were omitted from further analyses.

**Supplementary Table 4.** Different approaches employed for quantification of host jump events

| Name                      | #taxa | #hosts | Analysis type                                                                                                     | Comments                                                                                   |
|---------------------------|-------|--------|-------------------------------------------------------------------------------------------------------------------|--------------------------------------------------------------------------------------------|
| 252-Empirical-Host10      | 252   | 10     | Uses a pre-computed set of posterior time scaled trees and an asymmetric discrete trait model with Markov Jumps   | Main analysis                                                                              |
| 252-Empirical-TipSwap10   | 252   | 10     | As above but with the host-type labels permuted                                                                   | Used as 'null model' to compare with the above                                             |
| 252-RAxML-Host10          | 252   | 10     | Uses a pre-computed set of bootstrapped trees from RAxML and an asymmetric discrete trait model with Markov Jumps | Alternative topology and ancestral reconstructions, used to compare with the main analysis |
| 252-RAxML-TipSwap10       | 252   | 10     | As above but with the host-type labels permuted                                                                   | Used as 'null model' to compare with the above                                             |
| Severe-97-Empirical-Host5 | 97    | 5      | Uses a pre-computed set of posterior time scaled trees and an asymmetric discrete trait model with Markov Jumps   | 'Severe' subsampling performed in order to balance the number of taxa per host-type        |
| Severe-97-ConstPop-Host5  | 97    | 5      | Trees inferred jointly from sequences and traits using an asymmetric discrete trait model with Markov Jumps       | To compare with the above                                                                  |
| Severe-97-BASTA-Host5     | 97    | 5      | Trees inferred using BASTA structured coalescent approximation                                                    | To compare with the above                                                                  |

**Supplementary Table 5.** Number of jumps between host-species groups and confidence intervals for all approaches used (as listed in Supplementary Table 4).

**Supplementary Table 6.** Identification of accessory genes enriched in isolates according to host-species and gain or loss of genes correlated with host-switching events.

**Supplementary Table 7.** Functional categories (GO terms) of genes correlated with switches into specific host-species.

| Gene Ontology | Description                                  | Total Number | Number Observed | Number Expected | P-value | GO Network | Host Group |
|---------------|----------------------------------------------|--------------|-----------------|-----------------|---------|------------|------------|
| GO:0051704    | multi-organism process                       | 21           | 18              | 12.21           | 0.0046  | BP         | Human      |
| GO:0009405    | pathogenesis                                 | 16           | 14              | 9.3             | 0.0097  | BP         | Human      |
| GO:0044764    | multi-organism cellular process              | 7            | 7               | 4.07            | 0.0205  | BP         | Human      |
| GO:0065008    | regulation of biological quality             | 7            | 7               | 4.07            | 0.0205  | BP         | Human      |
| GO:0016772    | transferase activity, transferring phosph... | 9            | 8               | 4.46            | 0.017   | MF         | Human      |
| GO:0033013    | tetrapyrrole metabolic process               | 2            | 2               | 0.35            | 0.03    | BP         | Ruminant   |
| GO:0033014    | tetrapyrrole biosynthetic process            | 2            | 2               | 0.35            | 0.03    | BP         | Ruminant   |
| GO:0003678    | DNA helicase activity                        | 2            | 2               | 0.42            | 0.044   | MF         | Ruminant   |
| GO:0043170    | macromolecule metabolic process              | 74           | 10              | 5.16            | 0.0041  | BP         | Birds      |
| GO:0009307    | DNA restriction-modification system          | 3            | 2               | 0.21            | 0.0129  | BP         | Birds      |
| GO:0044355    | clearance of foreign intracellular DNA       | 3            | 2               | 0.21            | 0.0129  | BP         | Birds      |
| GO:0006259    | DNA metabolic process                        | 47           | 7               | 3.28            | 0.0193  | BP         | Birds      |
| GO:0071704    | organic substance metabolic process          | 88           | 10              | 6.14            | 0.0197  | BP         | Birds      |
| GO:0006952    | defense response                             | 4            | 2               | 0.28            | 0.0249  | BP         | Birds      |
| GO:0006807    | nitrogen compound metabolic process          | 78           | 9               | 5.44            | 0.0325  | BP         | Birds      |
| GO:0090304    | nucleic acid metabolic process               | 65           | 8               | 4.53            | 0.0355  | BP         | Birds      |
| GO:0006139    | nucleobase-containing compound metabolic...  | 67           | 8               | 4.67            | 0.043   | BP         | Birds      |
| GO:0003676    | nucleic acid binding                         | 108          | 19              | 11.9            | 0.0028  | MF         | Birds      |
| GO:0004519    | endonuclease activity                        | 6            | 3               | 0.66            | 0.0191  | MF         | Birds      |
| GO:0043565    | sequence-specific DNA binding                | 29           | 7               | 3.19            | 0.0253  | MF         | Birds      |
| GO:0004518    | nuclease activity                            | 7            | 3               | 0.77            | 0.031   | MF         | Birds      |
| GO:0003677    | DNA binding                                  | 94           | 15              | 10.36           | 0.0404  | MF         | Birds      |
| GO:0006812    | cation transport                             | 7            | 5               | 1.47            | 0.0048  | BP         | Pig        |
| GO:0006811    | ion transport                                | 9            | 5               | 1.88            | 0.0205  | BP         | Pig        |

**Supplementary Table 8.** Functional groups of pseudogenes enriched in *S. aureus* by host-species

**Supplementary Table 9. Isolates selected for positive selection analysis according to the Online Methods.**



| CC45_Humans_1 | CC45_Humans_2 | CC45_Humans_3 | CC59_Humans_1     | CC59_Humans_2     |
|---------------|---------------|---------------|-------------------|-------------------|
| 434061        | 423817        | 423811        | 0864N0012         | 0864N0012         |
| 438615        | 423818        | 433081        | 0864N0014         | 0864N0014         |
| 4414311       | 438626        | 434051        | 0864N0015         | 0864N0015         |
| 441433        | 438674        | 438612        | 61223             | 7068522           |
| 4414510       | 441426        | 4395311       | 7229531           | 7229531           |
| 441458        | 441454        | 441466        | 7474263           | 7474263           |
| 613335        | 443011        | 441528        | 7474292           | 7474292           |
| 7068520       | 446554        | 7474282       | M013              | M013              |
| 7229649       | 6133112       | 8113456       | SA40              | SA40              |
| 7396285       | 623614        | CA347         | SA957             | SA957             |
| ST30_Humans_1 | ST30_Humans_2 | ST30_Humans_3 | ST239_Humans_1    | ST239_Humans_2    |
| 435023        | 438625        | 433025        | 434063            | 434063            |
| 4386610       | 441413        | 4386212       | 434064            | 434064            |
| 438662        | 441421        | 441411        | 438669            | 438669            |
| 438675        | 441461        | 4414511       | 441427            | 612111            |
| 441424        | 441529        | 4414610       | 612111            | 6133212           |
| 441453        | 458473        | 613311        | 6133212           | 613332            |
| 443015        | 613318        | 613316        | 613332            | 7065864           |
| 613315        | 7396260       | 7065830       | 7065864           | Bmb9393           |
| 613334        | 8113481       | 8113425       | JKD6008           | T0131             |
| MRSA252       | 8728565       | 8113466       | T0131             | TW20              |
| CC5_Humans_1  | CC5_Humans_2  | CC5_Humans_3  | ST239_Humans_3    | ST8_Humans_1      |
| 433027        | 16035         | 18583         | 434063            | 423816            |
| 434054        | 435018        | 433024        | 434064            | 4330811           |
| 4350112       | 4350211       | 433026        | 6133212           | 433089            |
| 435011        | 438617        | 433083        | 613332            | 434062            |
| 438687        | 4386510       | 435027        | 7065864           | 438656            |
| 4395211       | 438673        | 441415        | Bmb9393           | 446552            |
| 441412        | 439527        | 613314        | JKD6008           | 7229483           |
| 441428        | 6133110       | 6236111       | T0131             | 7396136           |
| 441457        | 613319        | 7229516       | TW20              | 8113414           |
| 4415311       | JH1           | JH9           | Z172              | Newman            |
| CC15_Humans_1 | CC15_Humans_2 | CC15_Humans_3 | ST8_Humans_2      | ST8_Humans_3      |
| 435075        | 4350210       | 4350111       | 433023            | 4238111           |
| 441435        | 435024        | 438618        | 435019            | 423814            |
| 4414612       | 435075        | 438683        | 4386211           | 434066            |
| 441469        | 441436        | 439523        | 4386512           | 443029            |
| 441522        | 441451        | 441431        | 438657            | 4465510           |
| 443017        | 443012        | 441469        | 4386611           | 789385            |
| 443028        | 6133211       | 441522        | 438665            | 8113414           |
| 623616        | 613331        | 441526        | 7229692           | 8113435           |
| 7229330       | 7229329       | 613321        | 7893810           | 8113529           |
| 7229695       | 7229695       | 7068523       | COL               | 8113575           |
| CC22_Humans_1 | CC22_Humans_2 | CC22_Humans_3 | CC12_Humans       | CC133_Ruminants_1 |
| 438658        | 4340512       | 4386710       | 0864N0092         | 61233             |
| 438672        | 4386811       | 4386711       | 441418            | 61240             |
| 441423        | 439521        | 4386712       | 441452            | 61243             |
| 441524        | 439525        | 4395210       | 443024            | 61248             |
| 441537        | 441455        | 441523        | 623619            | 61249             |
| 443019        | 4415212       | 441531        | 7229312           | 61252             |
| 443025        | 441533        | 441534        | 7229488           | 61258             |
| 6236110       | 4430111       | 441535        | 7229536           | 973N0009          |
| 7065844       | 458471        | 443022        | 8113449           | 973N0048          |
| 8113592       | 7068517       | 613313        | 8113487           | ED133             |
| CC151_Cows_1  | CC151_Cows_2  | 973N0083      | CC133_Ruminants_2 | CC133_Ruminants_3 |
| 7068527       | 7068527       | CC151_Cows_3  | 61234             | 61233             |
| 7068529       | 7068529       | 10900259      | 61235             | 61234             |
| 7068538       | 7068531       | 7068529       | 61237             | 61235             |
| 973N0058      | 7068538       | 7068531       | 61241             | 61237             |
| 973N0061      | 973N0061      | 7068538       | 61243             | 61240             |
| 973N0062      | 973N0062      | 973N0061      | 61244             | 61243             |
| 973N0068      | 973N0068      | 973N0062      | 61249             | 973N0009          |
| 973N0082      | 973N0076      | 973N0068      | 61258             | 973N0010          |
| 973N0083      | 973N0082      | 973N0076      | 973N0010          | 973N0054          |
| RF122         | 973N0083      | 973N0082      | ED133             | ED133             |

| CC97_Cows_1 | CC97_Cows_2 | CC97_Cows_3 | CC398_Pigs_1 | CC398_Pigs_2 |
|-------------|-------------|-------------|--------------|--------------|
|-------------|-------------|-------------|--------------|--------------|

|                    |                    |                    |                    |                     |
|--------------------|--------------------|--------------------|--------------------|---------------------|
| 10900246           | 10900246           | 52701              | 973N0044           | 973N0044            |
| 52704              | 52705              | 80382              | SRR445028          | SRR445028           |
| 52710              | 80379              | 80386              | SRR445034          | SRR445034           |
| 7068528            | 80381              | 80388              | SRR445230          | SRR445060           |
| 80382              | 80383              | 9119280            | SRR445239          | SRR445236           |
| 80386              | 80386              | 973N0053           | SRR445265          | SRR445239           |
| 80387              | 80388              | 973N0075           | SRR445266          | SRR445266           |
| 973N0057           | CHILE5             | CHILE5             | SRR445281          | SRR445276           |
| 973N0075           | CTH54              | CTH54              | SRR445286          | SRR445281           |
| LMA1166B           | RC7                | LMA1166B           | SRR445291          | SRR445291           |
| <b>CC5_Birds_1</b> | <b>CC5_Birds_2</b> | <b>CC5_Birds_3</b> | <b>CC385_Birds</b> | <b>CC398_Pigs_3</b> |
| 61267              | 61267              | 61267              | 61263              | 973N0044            |
| 61270              | 61270              | 61270              | 61269              | SRR445028           |
| 61271              | 61272              | 61274              | 61282              | SRR445034           |
| 61274              | 61280              | 61280              | 61283              | SRR445035           |
| 61280              | 61281              | 61281              | 61284              | SRR445060           |
| 61281              | 61287              | 61288              | 61286              | SRR445236           |
| 61287              | 61288              | 61289              | 61290              | SRR445237           |
| 61288              | 61289              | 61291              | 8014464            | SRR445266           |
| 61289              | 61291              | 973N0091           | 973N0056           | SRR445286           |
| 973N0091           | 973N0091           | ED98               | CC385_Birds        | SRR445291           |

**Supplementary Table 10.** Proportion of genes exhibiting positive selection in different host species/lineages.

| CC/ST | Host      | Core genome | Genes under selection | Proportion |
|-------|-----------|-------------|-----------------------|------------|
| CC12  | Humans    | 2444        | 36                    | 1.47%      |
| CC15  | Humans    | 2406        | 64                    | 2.66%      |
| CC22  | Humans    | 2596        | 83                    | 3.20%      |
| CC45  | Humans    | 2488        | 61                    | 2.45%      |
| CC59  | Humans    | 2395        | 42                    | 1.75%      |
| CC5   | Humans    | 2456        | 86                    | 3.50%      |
| ST239 | Humans    | 2571        | 67                    | 2.61%      |
| ST30  | Humans    | 2558        | 85                    | 3.32%      |
| ST8   | Humans    | 2545        | 87                    | 3.42%      |
| CC151 | Ruminants | 2554        | 51                    | 2.00%      |
| CC97  | Ruminants | 2408        | 111                   | 4.61%      |
| CC133 | Ruminants | 2512        | 129                   | 5.14%      |
| CC385 | Birds     | 2419        | 47                    | 1.94%      |
| CC5   | Birds     | 2532        | 33                    | 1.30%      |
| CC398 | Pigs      | 2445        | 42                    | 1.72%      |

**Supplementary Table 11.** Functional categories (GO terms) of genes under positive selection in different host species

**Supplementary Table 12.** Distribution of anti-microbial resistance determinants according to host-species group

## Supplementary Notes

### **Further details for the validation of Host Jump Analysis.**

Figures 5-11 relate to the host jump analysis using BEAST. The number of host jumps between host-types can be estimated using a discrete trait model with Markov Jumps on phylogenetic trees. To assess the robustness of the main analysis of 10 subsamples of 252 taxa each (figure 2 and supplementary figures 2 & 4), we performed several additional analyses (10 replicates each) as indicated in the table below. These analyses include 'severe balanced' subsamples of 97 taxa each containing 18-20 taxa of 5 host-types (Birds, Cattle, Humans, Pigs, Sheep&Goats), and ancestral state and host-jumps using the BASTA approximation to the structured coalescent. BASTA can help with dealing with population sampling bias issues when trying to infer migration rates between populations, however due to the large number of sequences and host-types, and diverse nature of the main analysis we were only able to perform it on the 'severe balanced' subsamples.

Consistently with the methods employed, there is strong evidence of human-cattle transmissions, human transmission into other animal species (notably goats and the carnivora) and transmission from other animal species, particularly cows, birds and pigs into humans. Furthermore, the analyses indicate that transmissions have been ongoing for thousands of years, and humans are an important source of *S. aureus* for domesticated animals. Number of jumps from/to the host-types and confidence intervals can be found in Supplementary Table 5.
